# Supplementary material for: Structural Basis of Molecular Recognition of the Leishmania Small Hydrophilic Endoplasmic Reticulum-associated Protein (SHERP) at Membrane Surfaces
Source: PubMed Central journal article supplement — J Biol Chem. 2010 Nov 24;286(11):9246–56. doi: 10.1074/jbc.M110.130427 (PMC3059043; doi:10.1074/jbc.m110.130427), 2010-11-24
Supplement: supp_M110.130427_jbc.M110.130427-1.pdf [file supp_M110.130427_jbc.M110.130427-1.pdf]

## SUPPLEMENTAL DATA

### **STRUCTURAL BASIS OF MOLECULAR RECOGNITION BY LEISHMANIA SMALL HYDROPHILIC ENDOPLASMIC RETICULUM-ASSOCIATED PROTEIN, SHERP, AT MEMBRANE SURFACES**

**Benjamin Moore<sup>‡</sup>, Andrew J Miles<sup>¶</sup>, Cristina Guerra-Giraldez<sup>||</sup>,  
Peter Simpson<sup>§</sup>, Momi Iwata<sup>§\*\*</sup>, B A Wallace<sup>¶</sup>, Stephen J Matthews<sup>§</sup>,  
Deborah F Smith<sup>||</sup>, and Katherine A Brown<sup>‡‡1</sup>**

From the <sup>‡</sup>Division of Cell and Molecular Biology, Centre for Molecular Microbiology and Infection and the <sup>§</sup>Division of Molecular Biosciences, Department of Life Sciences, Imperial College London, Exhibition Road, London SW7 2AZ, and the <sup>¶</sup>Department of Crystallography, Institute of Structural and Molecular Biology, Birkbeck College, University of London, London WC1E 7HX, and the <sup>||</sup>Centre for Immunology and Infection, Department of Biology, University of York, Heslington, York YO10 5YW, and the <sup>\*\*</sup>Membrane Protein Laboratory, Diamond Light Source Limited, Harwell Science and Innovation Campus, Chilton, Didcot, Oxfordshire OX11 0DE, United Kingdom, and the <sup>‡‡</sup>Institute for Cellular and Molecular Biology, The University of Texas at Austin, 1 University Station A4800, Austin, Texas 78712, USA

<sup>1</sup>To whom correspondence should be addressed: Division of Cell and Molecular Biology, CMMI, Flowers Building, Imperial College London, Exhibition Road, London SW7 2AZ, United Kingdom. Tel.: 44-20-7594-5298; Fax: 44-20-7594-5297; E-mail: k.brown@imperial.ac.uk

FIGURE S1 2D  $^1\text{H}$ - $^{15}\text{N}$  HSQC NMR spectrum of *L. major* SHERP at 4 °C in the absence of SDS or phospholipids. The poor amide  $^1\text{H}$  dispersion is indicative of a lack of tertiary structure.

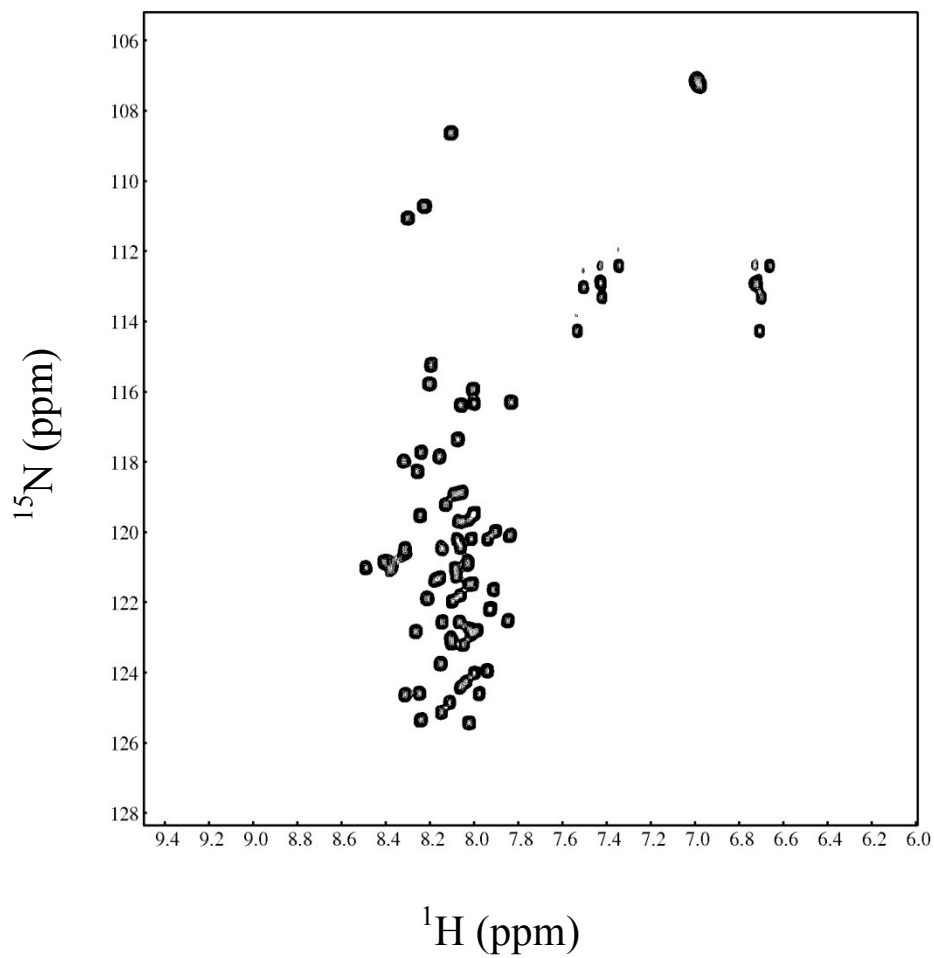

FIGURE S2  $^1\text{H}$ - $^{15}\text{N}$  heteronuclear NOE spectrum of *L. major* SHERP at 4 °C in the absence of SDS or phospholipids. The spectrum shown is a summation of the reference and NOE spectrum corresponding to (0.8 times the reference – NOE spectrum). Residual signals thus correspond to those with a significant  $^1\text{H}$ - $^{15}\text{N}$  NOE contribution arising from extensive internal motion on the ps timescale, which for the free SHERP is observed in essentially all residues (for comparison with Figure S2).

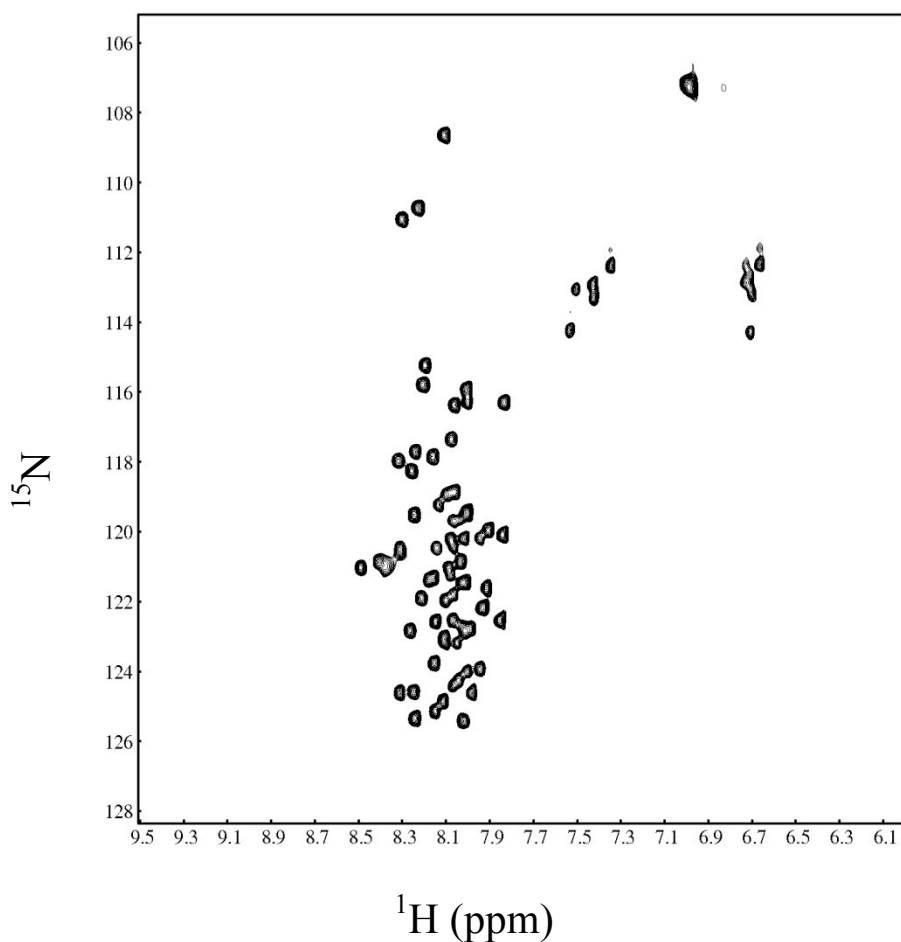

**FIGURE S3 SDS-PAGE avidin-column fractions analyzed to identify SHERP-SBED complexes containing a biotinylated label.** Lanes labeled correspond to the flow-through (FT), wash (W) and elution (E) fractions. Bands labeled with numbers correspond to sample numbers shown in Table S1 below.

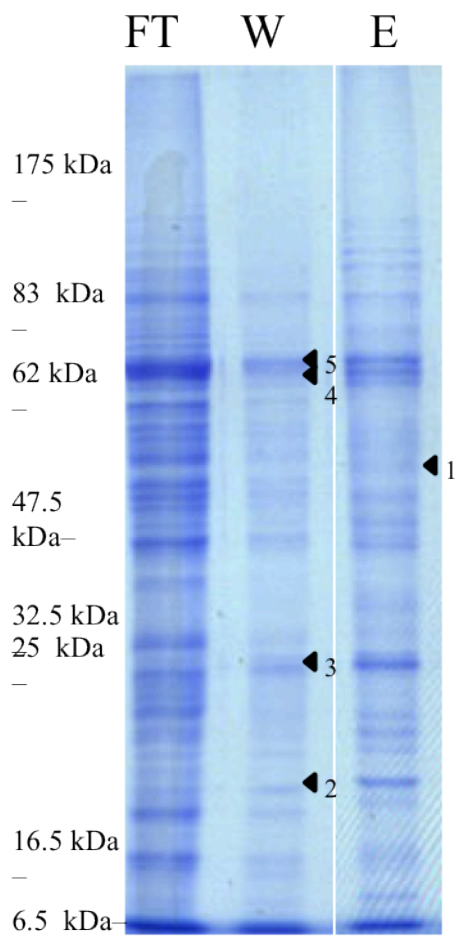

FIGURE S4 Amino acid sequence alignment between the *L. major* and *T. thermophilus* V-ATPase subunit B. A ClustalW2 alignment is shown. Identical residues (blue), conserved substitutions (green) and semi-conserved substitutions (yellow) are colored according to ClustalW2 conventions (see <http://www.ebi.ac.uk/Tools/clustalw2/index.html> and Larkin M.A., et al. (2007) *Bioinformatics* **23**, 2947-2948).

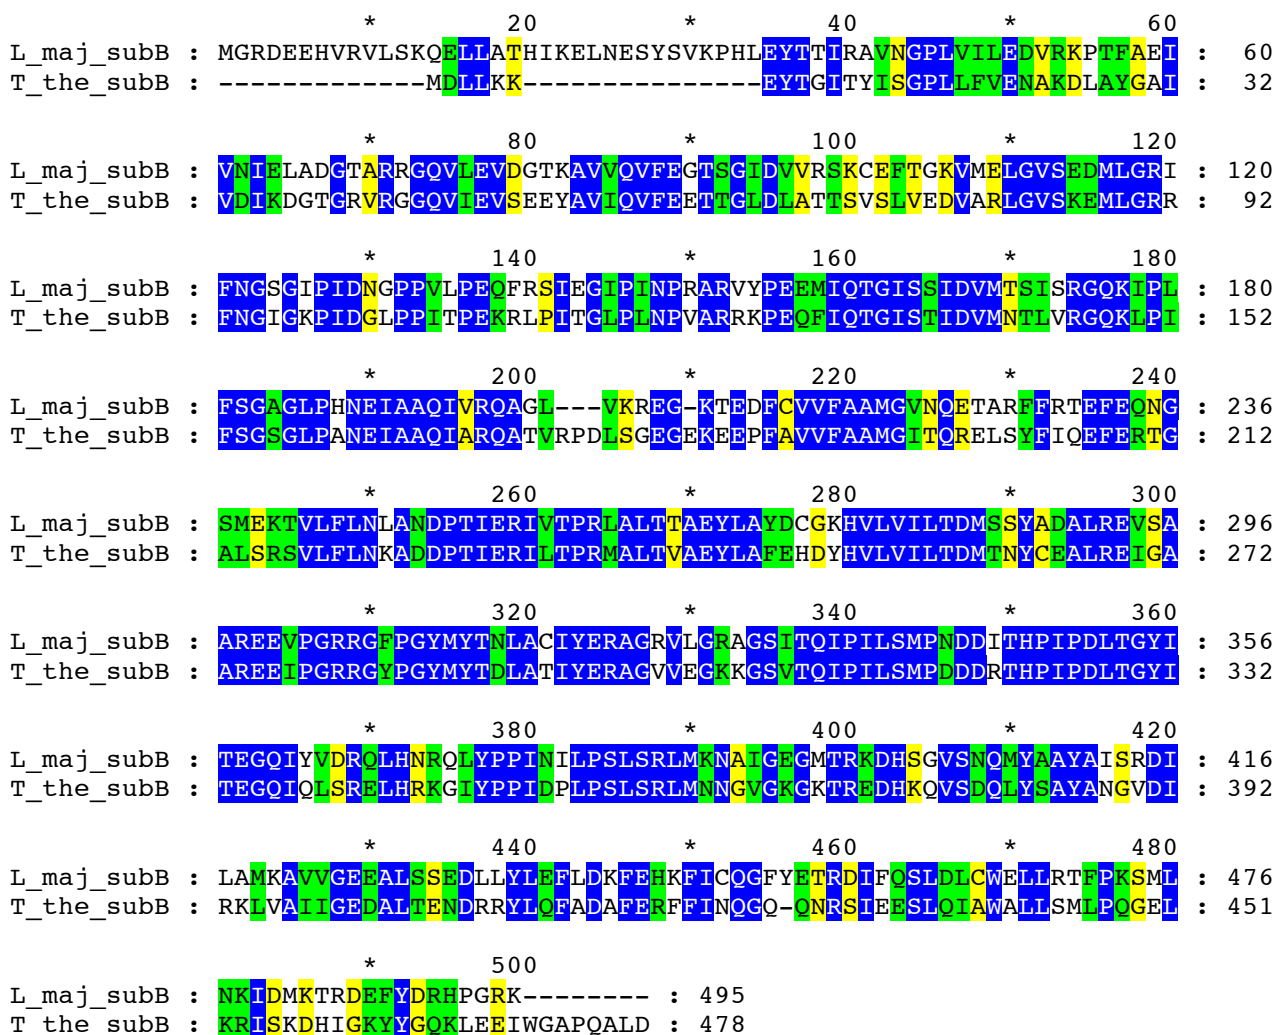

FIGURE S5 **Recombinant *L. major* SHERP binding to *T. thermophilus* V-ATPase demonstrated by surface plasmon resonance.** *T. thermophilus* V-ATPase at 0.2 mg/ml in 10 mM sodium acetate buffer, pH 5.0 was immobilized to a CM5 chip by amine coupling. Injection of *L. major* SHERP at a flow rate of 5 ul/min is shown for concentrations ranging from 0.5  $\mu$ M (red) to 15  $\mu$ M (dark blue) are shown along with the associated fits (dashed lines) to the raw data based upon a 1:1 Langmuir binding model. Binding was measured as response units over time. See main article for more details on the experimental data and analysis.

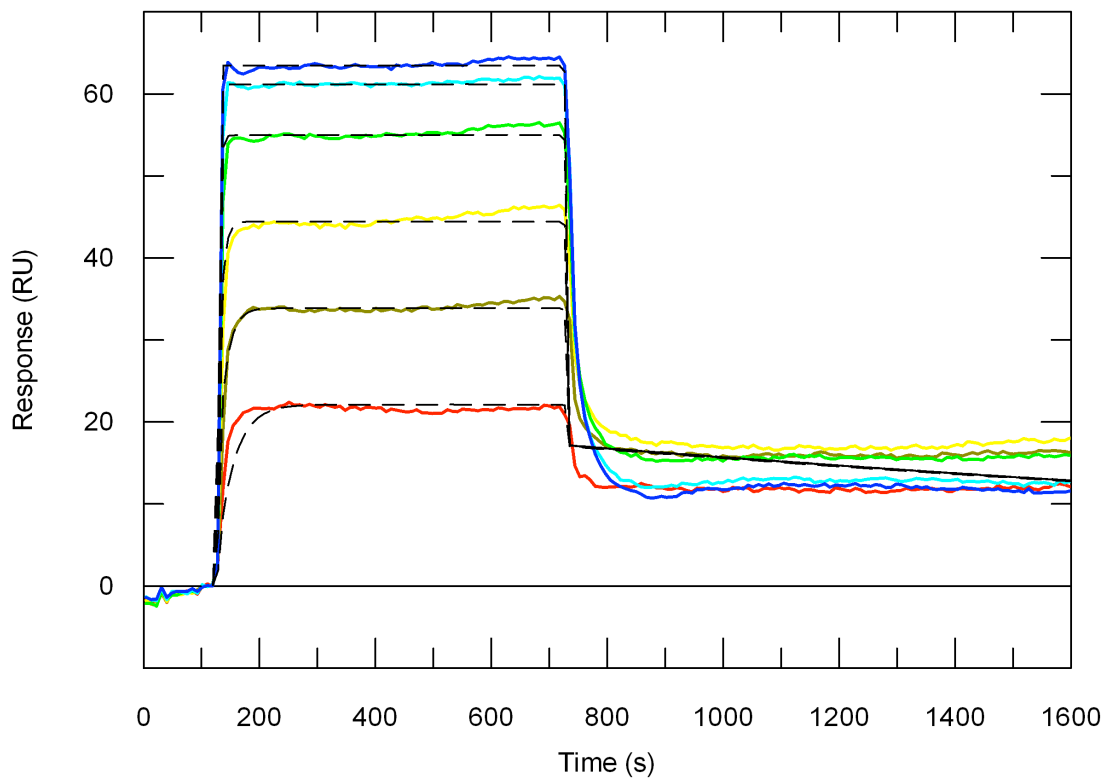

**TABLE S1**

**Summary of mass spectrometric analyses of *Leishmania major* proteins isolated from cross-linking studies with recombinant *L. major* SHERP**

| <b>Sample No.</b> | <b>Molecular Mass (kDa)</b> | <b>MOWSE Score<sup>a</sup></b> | <b>GeneDB Identifier</b> | <b>Description</b>                        |
|-------------------|-----------------------------|--------------------------------|--------------------------|-------------------------------------------|
| <b>1</b>          | <b>55</b>                   | <b>301</b>                     | LmjF28.2430              | vacuolar ATP synthase subunit B, putative |
| <b>2</b>          | <b>25</b>                   | <b>121</b>                     | LmjF23.0040              | peroxidoxin<br>tryparedoxin peroxidase    |
| <b>3</b>          | <b>27</b>                   | <b>381</b>                     | LmjF36.5010              | 40S ribosomal protein SA, putative        |
| <b>4</b>          | <b>68</b>                   | <b>111</b>                     | LmjF29.1760              | paraflagellar rod protein 1D, putative    |
| <b>5</b>          | <b>71</b>                   | <b>574</b>                     | LmjF28.2780              | heat-shock protein hsp70, putative        |

<sup>a</sup> Pappin, D. J., Hojrup, P., and Bleasby, A. J. (1993) *Curr. Bio.* **3**, 327–332
